# Supplementary material
Source: PubMed Central journal article supplement (PMC3757553)
Supplement: NIHMS502251-supplement-Supporting_Information.pdf [file NIHMS502251-supplement-Supporting_Information.pdf]

## **Supporting Information**

### **Contents**

|                                                                                                               |         |
|---------------------------------------------------------------------------------------------------------------|---------|
| 1. NMR experiments                                                                                            | Page S2 |
| 2. Figure S1: One dimensional $^1\text{H}$ NMR spectra                                                        | S3      |
| 3. Figure S2: Expanded NOESY spectra                                                                          | S4      |
| 4. Figure S3: Low field regions of $^1\text{H}$ -NMR spectra                                                  | S6      |
| 5. Figure S4: IPAP spectra                                                                                    | S7      |
| 6. Deuterium isotope effect measurements, Table S1                                                            | S8      |
| 7. UV thermal melting experiments                                                                             | S9      |
| 8. UV melting and osmotic stress data for RNA and 2'-F RNA hairpins,<br>Tables S2 to S7 and Figures S5 to S10 | S10     |
| 9. Figure S11: NMR solution structure of RNA hairpin with U <sub>4</sub> loop                                 | S22     |

## 1. NMR experiments

Oligonucleotides were purified by RP-HPLC using a TEAA/acetonitrile buffer mixture and were lyophilized several times from aqueous ammonium solution and water to remove any trace of volatile HPLC material prior to preparation of the NMR sample. Oligonucleotides were dissolved in 180  $\mu$ L of D<sub>2</sub>O containing 150 mM NaCl and 10 mM phosphate buffer (Na<sub>2</sub>HPO<sub>4</sub>/KH<sub>2</sub>PO<sub>4</sub>) at pH 7.4 (uncorrected for deuterium effect) for NMR analysis. The concentration of the 2'-F RNA sample was 1.4 mM and that of the native RNA was 1.75 mM. For the acquisition of spectra containing the exchangeable protons, the sample was dried and the residue immediately taken up in 180  $\mu$ L of H<sub>2</sub>O/D<sub>2</sub>O (9:1; v/v).

NMR experiments were performed either on Bruker AVANCE 800 MHz or 600 MHz spectrometers. Different sets of two-dimensional spectra were recorded at different temperatures varying from 5 to 40°C. NOESY experiments in D<sub>2</sub>O buffer were acquired with mixing times of 400, 250, 125, and 62.5 ms. NOESY spectra detecting exchangeable protons were recorded with mixing times of 400, 250, and 100 ms. DQF-COSY and TOCSY spectra were recorded to aid the assignment, the latter with a mixing time of 80 ms. All two-dimensional spectra were acquired with 2k complex data points in *t*<sub>2</sub> and 512 real points in *t*<sub>1</sub> with a relaxation delay of 2 s.

<sup>1</sup>H, <sup>13</sup>C HMQC spectra were recorded on a Bruker AVANCE 14.1 T (600 MHz, <sup>1</sup>H nuclei) spectrometer at 25°C in 50% D<sub>2</sub>O/H<sub>2</sub>O. Two-dimensional spectra were acquired with 2k complex data points in *t*<sub>2</sub> and 128 real points in *t*<sub>1</sub> with a relaxation delay of either 2 s or 1.5 s.

Sequential assignment of exchangeable and non-exchangeable protons was conducted following standard methods for duplex RNA. The DQF-COSY spectrum showed four pairs of cross peaks, characteristic of J-coupled spins of the H<sub>5</sub> and H<sub>6</sub> protons in cytosine and uracil rings. Due to their labile nature H<sub>8</sub> protons from guanine bases in 2'-F RNA were difficult to assign and were therefore identified from leftover cross peaks and from H<sub>8</sub>/H<sub>2'</sub> cross peaks.

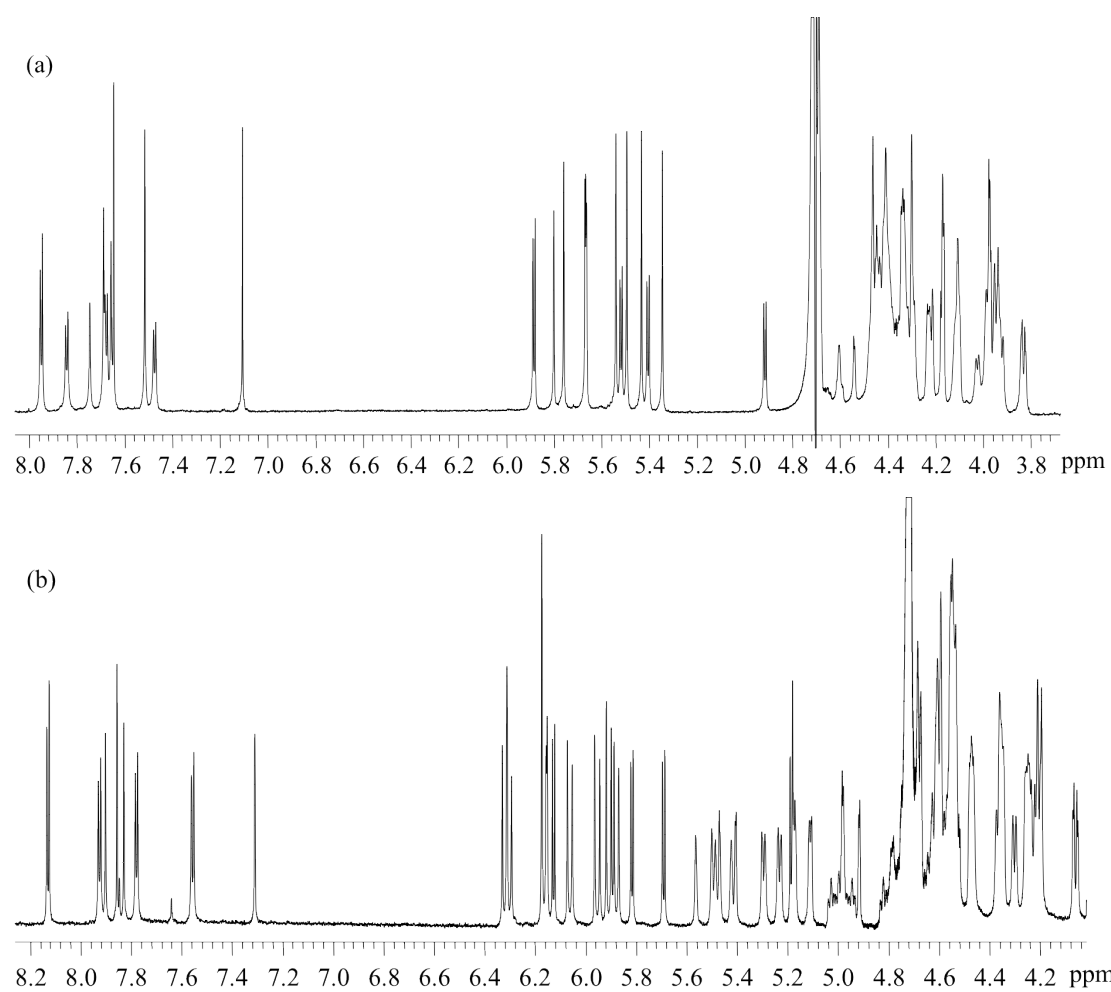

**Figure S1.** One dimensional  $^1\text{H}$  NMR spectrum of (a)  $[\text{r}(\text{CGAAUUCG})]_2$  and (b)  $[\text{f}(\text{CGAAUUCG})]_2$  in phosphate-buffered  $\text{D}_2\text{O}$  at  $25^\circ\text{C}$ .

(a)

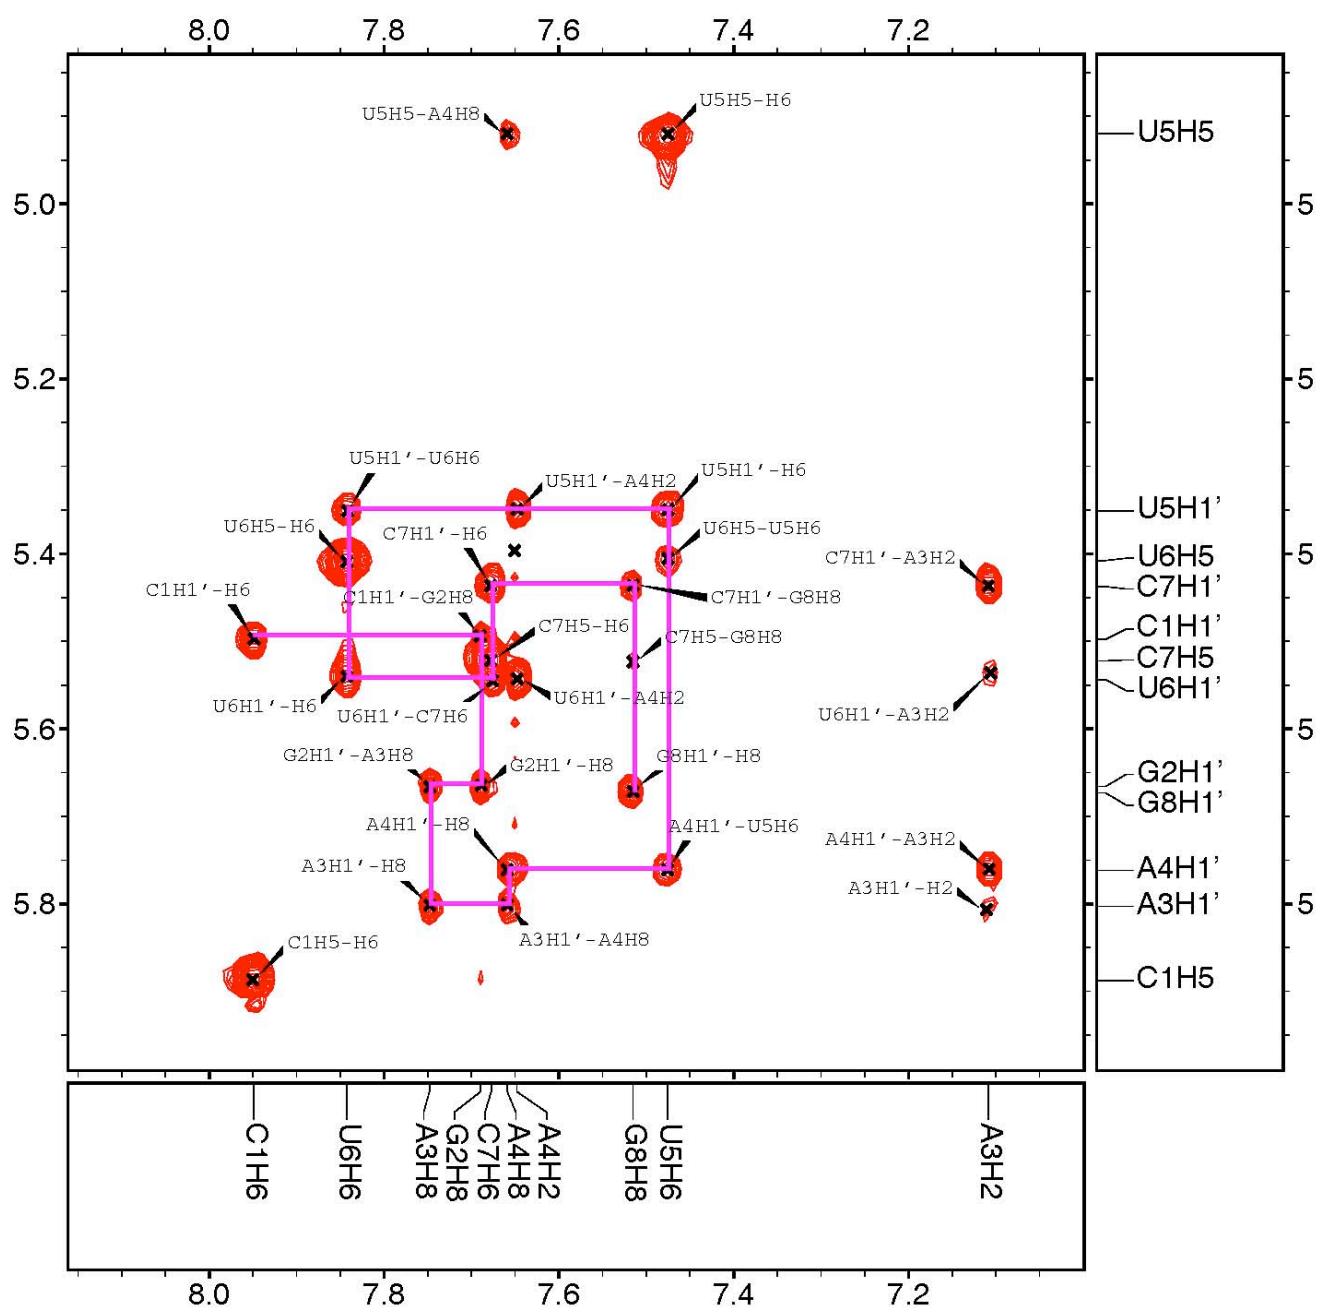

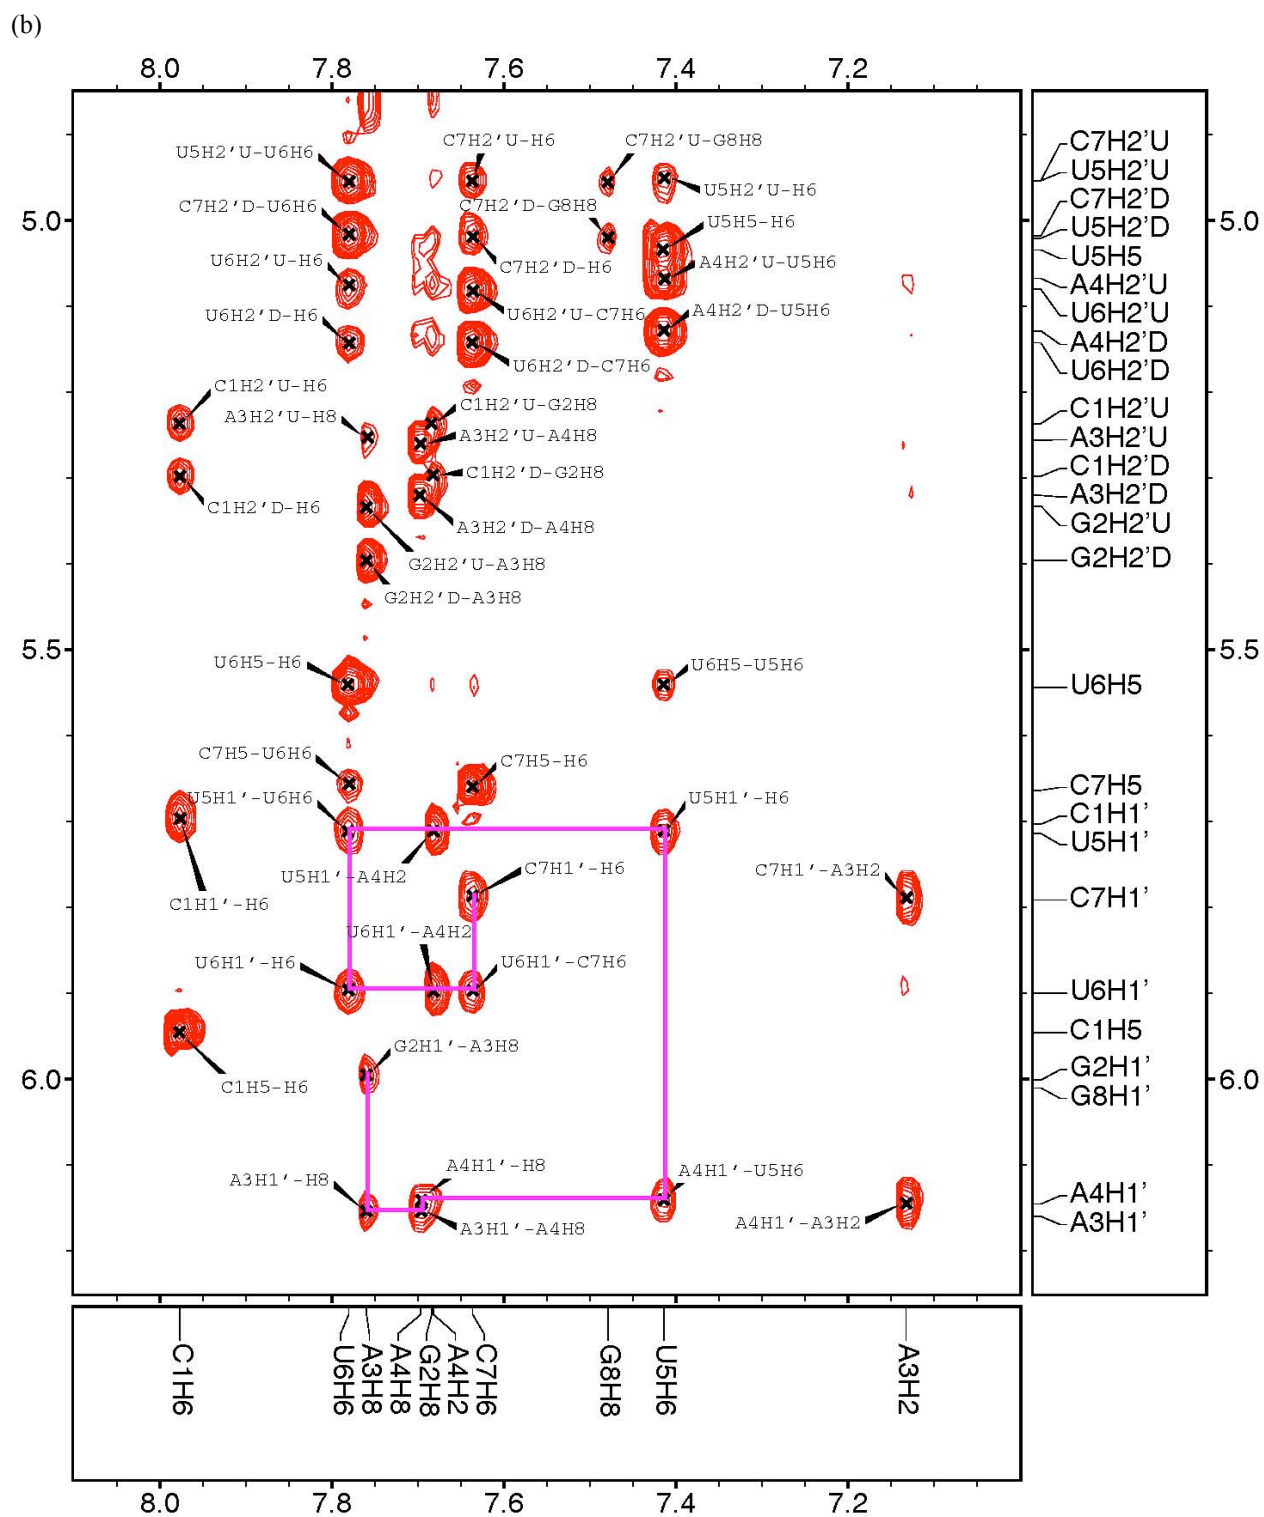

**Figure S2.** Expansion of the NOESY spectrum of (a)  $[r(CGAAUUCG)]_2$  and (b)  $[f(CGAAUUCG)]_2$  in buffered  $D_2O$  at 800 MHz, 298 K and a mixing time of 250 ms, showing NOE connectivities between H1' resonances of riboses and protons of nucleobases.

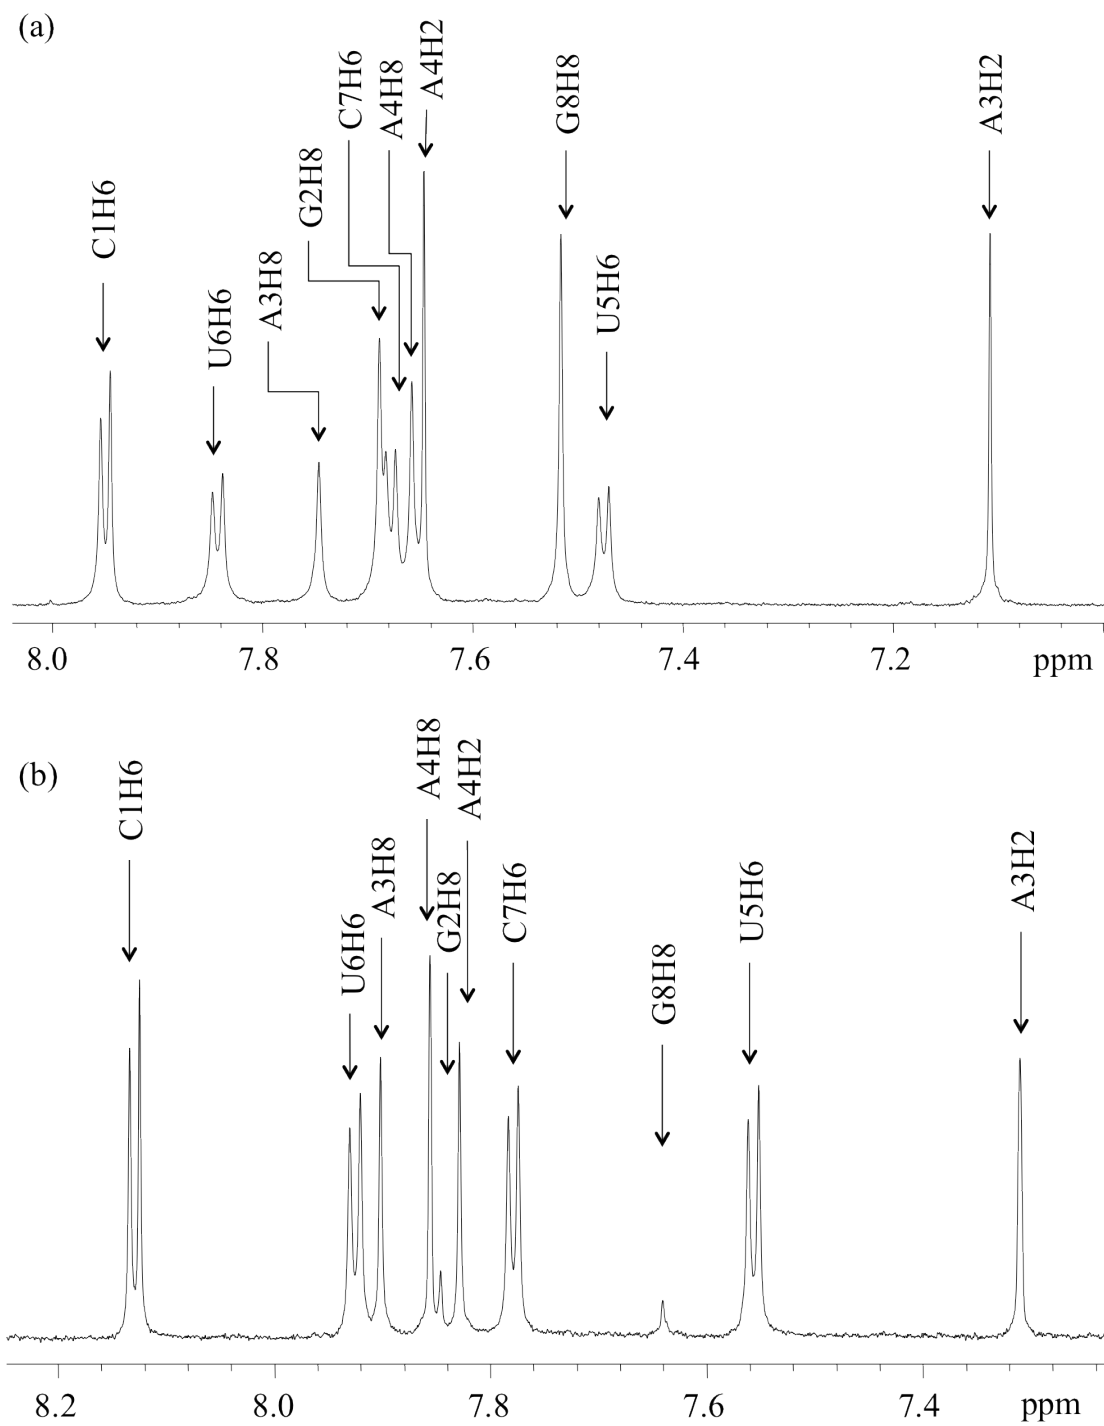

**Figure S3.** Low field region of  $^1\text{H}$ -NMR spectrum of (a)  $[\text{r}(\text{CGAAUUCG})]_2$  at 298 K and (b)  $[\text{f}(\text{CGAAUUCG})]_2$  at 313 K in phosphate-buffered  $\text{D}_2\text{O}$  at 800 MHz. Resonances of individual protons are labeled.

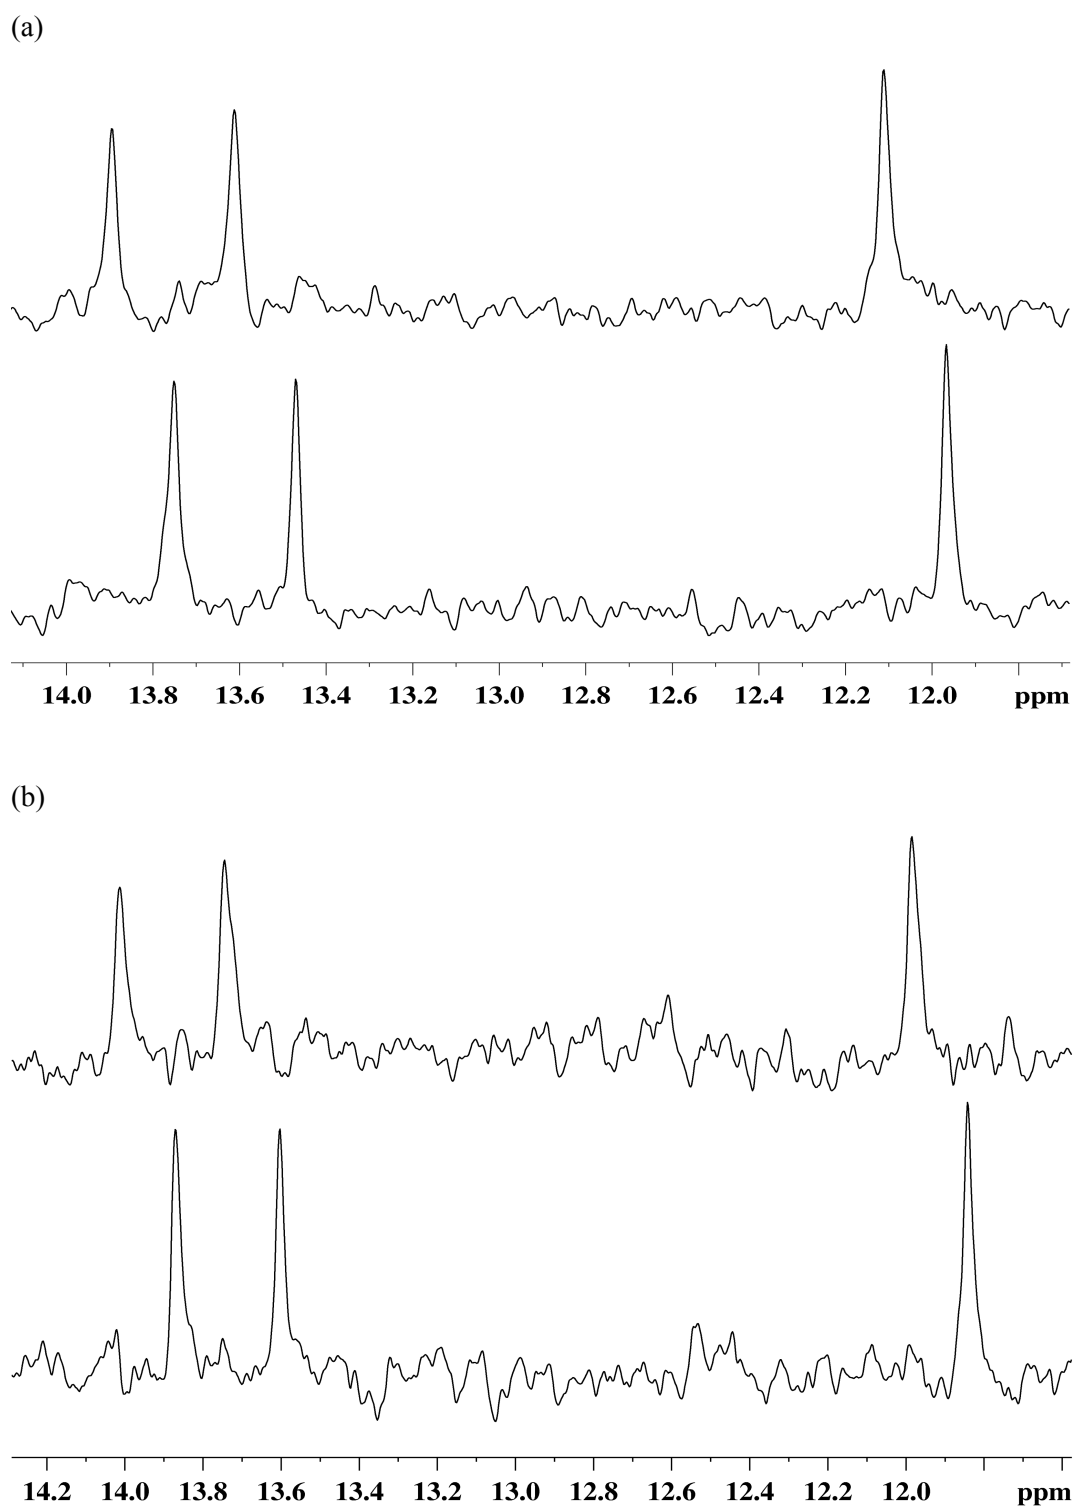

**Figure S4.** One-dimensional  $^{15}\text{N}$ -coupled  $^1\text{H}$  IPAP spectra in the imino region of (a) 5'-[r(CGAAUUCG)]<sub>2</sub> and (b) [f(CGAAUUCG)]<sub>2</sub> in 10% D<sub>2</sub>O/H<sub>2</sub>O at 5°C. The spectra at the top in (a) and (b) were obtained from adding the IP and AP spectra, whereas the lower spectra were obtained by subtraction, IP - AP.

**Table S1.** Deuterium isotope effect (DIE) measurements for RNA and 2'-F RNA<sup>a</sup>

| Base Pair     | RNA ( $\delta^{13}\text{C}2\{\text{H}3\}$ ) <sup>b</sup> | $\delta_{\text{H}3}$ (RNA) | 2'-F RNA ( $\delta^{13}\text{C}2\{\text{H}3\}$ ) <sup>b</sup> | $\delta_{\text{H}3}$ (2'-F RNA) |
|---------------|----------------------------------------------------------|----------------------------|---------------------------------------------------------------|---------------------------------|
| <b>A3:U14</b> | -55.3±0.6                                                | 7.17                       | -63.6±0.1                                                     | 7.15                            |
| <b>A4:U13</b> | -58.1±0.5                                                | 7.70                       | -62.8±0.2                                                     | 7.70                            |

<sup>a</sup> Units of  ${}^n\Delta A = \delta_A\{\text{H}3\} - \delta_A\{\text{H}3\}$  are in ppb, and units of  $\delta_{\text{H}3}$  are in ppm. <sup>b</sup> Shown here are values from two separate data sets.



## 2. UV thermal melting experiments

Melting of each oligonucleotide hairpin (16 mM) was performed in 10 mM sodium cacodylate (pH = 7.4), 0.1 mM EDTA, and 300 mM NaCl in the presence of 0, 5, 10, 15, and 20 % weight/volume of either ethylene glycol or acetamide (**Table 1**). Absorbance vs. temperature profiles were measured at 280 nm on a Shimadzu 800 UV-Visible spectrometer equipped with an eight-position Peltier temperature controller. The temperature was increased at 0.5 °C per minute. The melting temperatures were obtained using the Shimadzu LabSolution TmAnalysis software. The experimental absorbance vs. temperature curves were converted into a fraction of strands remaining hybridized ( $\alpha$ ) vs. temperature curves by fitting the melting profile to a two-state transition model, with linearly sloping lower and upper base lines. The melting temperatures ( $T_m$ , **Table 1**, column 2) were obtained directly from the temperature at  $\alpha = 0.5$ . The final  $T_m$  was an approximation of usually five to eight measurements.

The thermodynamic parameters ( $\Delta H$ ,  $\Delta S$  and  $\Delta G$ ) were obtained by van't Hoff analysis of melting curves using Varian Cary software (**Table 1**, columns 4-6). In addition, the enthalpy of the melting was determined from the width at the half-height of differentiated melting curves (**Table 1**, column 3). The fraction of strands remaining hybridized ( $\alpha$ ) vs. temperature curves were converted into differentiated melting curves [ $\delta\alpha/\delta(T_m^{-1})$  vs.  $T_m$ ] using Varian Cary software. The width of the differentiated melting curve at the half-height is inversely proportional to the van't Hoff transition enthalpy; for a monomolecular transition  $\Delta H = 7.0/(T_1^{-1} - T_2^{-1})$  where  $T_1$  is the lower temperature and  $T_2$  is the upper temperature (both in K) at one-half of [ $\delta\alpha/\delta(T_m^{-1})$ ].<sup>[1]</sup>

Osmotic stress experiments were performed as described in previous publications.<sup>[2]</sup> A detailed experimental manual has been also published.<sup>[3]</sup>

---

[<sup>1</sup>] K. J. Breslauer, *Methods Enzymol.* **1995**, 259, 221-242.

[<sup>2</sup>] (a) E. Rozners, J. Moulder, *Nucleic Acids Res.* **2004**, 32, 248-254. (b) P. S. Pallan, E. M. Greene, P. A. Jicman, R. K. Pandey, M. Manoharan, E. Rozners, M. Egli, *Nucleic Acids Res.* **2011**, 39, 3482–3495.

[<sup>3</sup>] E. Rozners, *Curr. Protoc. Nucleic Acid Chem.* **2010**, 7.14.1-7.4.13.

**Table S2.** Experimental  $t_m$  and thermodynamic data for melting of r[**GCGUUUCGC**]

| Trial #                         | 0%   | 5%          | 10%         | 15%         | 20%         | T1    | T2    | $-\Delta H$<br>(cal/mol)<br>$\delta\alpha/\delta T_m$ | Van't Hoff -<br>$\Delta H$ (kcal/mol) | Van't Hoff $-\Delta S$<br>(kcal/mol*K) | $\Delta G(37^\circ\text{C})$<br>(kcal/mo) |
|---------------------------------|------|-------------|-------------|-------------|-------------|-------|-------|-------------------------------------------------------|---------------------------------------|----------------------------------------|-------------------------------------------|
| <b>Ethylene Glycol at 280nm</b> |      |             |             |             |             |       |       |                                                       |                                       |                                        |                                           |
|                                 | 52.5 | 51.7        | 50.5        | 49.9        | 49.0        | 39.34 | 66.58 | 27256                                                 | 29.99                                 | 0.09193                                | -1.5                                      |
|                                 | 51.5 | 51.6        | 50.2        | 50.1        | 48.7        | 38.73 | 64.85 | 28225                                                 | 31.72                                 | 0.09772                                | -1.4                                      |
|                                 | 51   | 51.9        | 50.3        | 50.0        | 48.3        | 38.17 | 64.01 | 28408                                                 | 31.87                                 | 0.09832                                | -1.4                                      |
|                                 | 52.7 | 51.1        | 50.3        | 48.3        | 48.4        | 38.88 | 65.26 | 27994                                                 | 30.91                                 | 0.09497                                | -1.5                                      |
|                                 | 52.1 | 51.4        | 50.5        | 49.8        | 48.6        | 41.07 | 69.05 | 26876                                                 | 31.02                                 | 0.09449                                | -1.7                                      |
|                                 | 51.6 | 50.9        | 50.2        | 49.2        | 48.2        | 38.81 | 64.95 | 28219                                                 | 30.18                                 | 0.09275                                | -1.4                                      |
|                                 |      | 51.9        | 50.3        | 49.4        | 47.3        |       |       |                                                       |                                       |                                        |                                           |
|                                 |      | 51.8        | 50.5        | 49.9        | 48.8        |       |       |                                                       |                                       |                                        |                                           |
|                                 |      | 52.6        | 50.0        | 49.0        | 48.9        |       |       |                                                       |                                       |                                        |                                           |
|                                 |      |             | 50.5        |             | 48.5        |       |       |                                                       |                                       |                                        |                                           |
|                                 |      |             | 50.8        |             | 48.7        |       |       |                                                       |                                       |                                        |                                           |
|                                 |      |             |             |             |             |       |       |                                                       |                                       |                                        |                                           |
| Average                         | 51.9 | <b>51.7</b> | <b>50.4</b> | <b>49.5</b> | <b>48.5</b> | 39.2  | 65.8  | 27829.5                                               | 30.9                                  | 0.09503                                | -1.5                                      |
| Standard Deviation              | 0.6  | <b>0.5</b>  | <b>0.2</b>  | <b>0.6</b>  | <b>0.5</b>  | 1.0   | 1.8   | 617.7                                                 | 0.8                                   | 0.0025754                              | 0.122359                                  |
| <b>Acetamide at 280nm</b>       |      |             |             |             |             |       |       |                                                       |                                       |                                        |                                           |
|                                 |      | 49.8        | 48.2        | 46.3        | 45.0        |       |       |                                                       |                                       |                                        |                                           |
|                                 |      | 49.7        | 48.0        | 46.5        | 44.8        |       |       |                                                       |                                       |                                        |                                           |
|                                 |      | 49.7        | 48.3        | 46.5        | 44.8        |       |       |                                                       |                                       |                                        |                                           |
|                                 |      | 49.4        | 48.7        | 46          | 44.4        |       |       |                                                       |                                       |                                        |                                           |
|                                 |      | 49.4        | 48.5        | 46.3        | 44.6        |       |       |                                                       |                                       |                                        |                                           |
|                                 |      | 49.5        | 48.2        | 46.9        | 44.8        |       |       |                                                       |                                       |                                        |                                           |
|                                 |      | 50.2        | 47.5        | 46.8        | 44.8        |       |       |                                                       |                                       |                                        |                                           |
|                                 |      | 50.4        | 48.1        | 46.4        | 44.4        |       |       |                                                       |                                       |                                        |                                           |
|                                 |      | 50.4        |             | 47          | 44.6        |       |       |                                                       |                                       |                                        |                                           |

|                    |  |      |      |      |      |  |  |  |  |  |
|--------------------|--|------|------|------|------|--|--|--|--|--|
|                    |  | 49.8 |      |      |      |  |  |  |  |  |
| Average            |  | 49.8 | 48.2 | 46.5 | 44.7 |  |  |  |  |  |
| Standard Deviation |  | 0.4  | 0.4  | 0.3  | 0.2  |  |  |  |  |  |

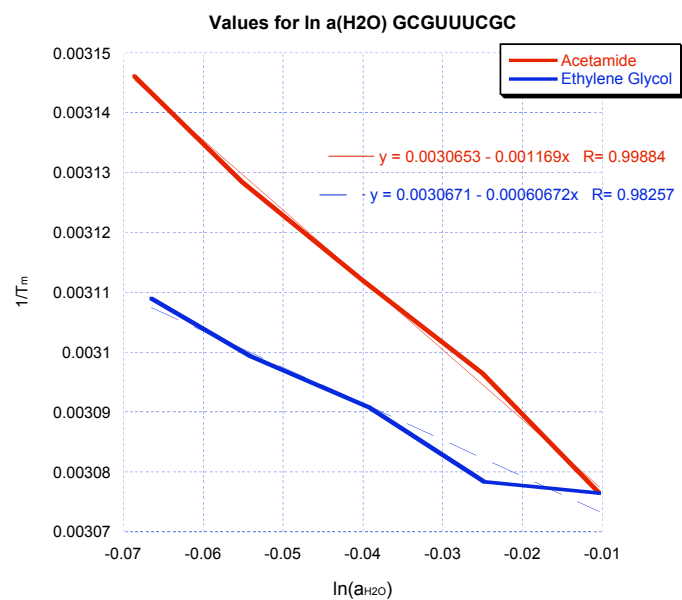

**Figure S5.** Plot of the inverse of the melting temperature versus the natural log of the water activity for both acetamide and ethylene glycol.

**Table S3.** Experimental  $t_m$  and thermodynamic data for melting of r(GCGUUUCGCA)

| Trial #                         | 0%   | 5%          | 10%         | 15%         | 20%         | T1    | T2    | $\Delta H$ (cal/mol)<br>$\delta\alpha/\delta T_m$ | Van't Hoff<br>$\Delta H$<br>(kcal/mol) | Van't Hoff $\Delta S$<br>(eu) | $\Delta G(37^\circ\text{C})$<br>(kcal/mol) |
|---------------------------------|------|-------------|-------------|-------------|-------------|-------|-------|---------------------------------------------------|----------------------------------------|-------------------------------|--------------------------------------------|
| <b>Ethylene Glycol at 280nm</b> |      |             |             |             |             |       |       |                                                   |                                        |                               |                                            |
|                                 | 64.1 | 63          | 61.3        | 56.7        | 55.5        | 53.1  | 76.9  | 33514                                             | 33.45                                  | 0.09905                       | -2.7                                       |
|                                 | 63.4 | 62.6        | 61.0        | 57.2        | 55.9        | 52.8  | 76.4  | 33732                                             | 34.4                                   | 0.1                           | -2.8                                       |
|                                 | 63.6 | 62.3        | 60.6        | 57.7        | 56.7        | 53.25 | 77.57 | 32920                                             | 33.93                                  | 0.1004                        | -2.8                                       |
|                                 | 63   | 62.4        | 61.5        | 57.9        | 55.3        | 52.39 | 75.69 | 34087                                             | 33.69                                  | 0.1001                        | -2.7                                       |
|                                 | 63.7 | 62.9        | 61.1        | 57.5        | 55.6        | 54.57 | 76.26 | 36923                                             | 37.56                                  | 0.1106                        | -3.3                                       |
|                                 | 63.3 | 62.1        | 61.2        | 57.2        | 55.1        | 52.68 | 75.97 | 34159                                             | 34.1                                   | 0.1012                        | -2.7                                       |
|                                 | 63.3 |             |             |             | 55.3        | 52.2  | 75.55 | 33980                                             | 34.09                                  | 0.1013                        | -2.7                                       |
|                                 |      |             |             |             |             | 52.3  | 75.34 | 34427                                             | 33.84                                  | 0.1004                        | -2.7                                       |
|                                 |      |             |             |             |             | 52.28 | 77.1  | 32118                                             | 36.34                                  | 0.1076                        | -3.0                                       |
|                                 |      |             |             |             |             | 53.83 | 75.96 | 36076                                             | 36.58                                  | 0.1085                        | -2.9                                       |
|                                 |      |             |             |             |             | 53.73 | 77.72 | 33436                                             | 36.57                                  | 0.108                         | -3.1                                       |
|                                 |      |             |             |             |             | 53.14 | 75.8  | 35141                                             | 38.03                                  | 0.1127                        | -3.1                                       |
|                                 |      |             |             |             |             | 52.72 | 75.75 | 34527                                             | 34.93                                  | 0.1034                        | -2.9                                       |
| Average                         | 63.5 | <b>62.6</b> | <b>61.1</b> | <b>57.4</b> | <b>55.6</b> | 53.0  | 76.3  | 34233.9                                           | 35.2                                   | 0.10426                       | -2.87396                                   |
| Standard Deviation              | 0.4  | <b>0.4</b>  | <b>0.3</b>  | <b>0.4</b>  | <b>0.5</b>  | 0.7   | 0.8   | 1267.2                                            | 1.6                                    | 0.00459                       | 0.19014                                    |
| <b>Acetamide at 280nm</b>       |      |             |             |             |             |       |       |                                                   |                                        |                               |                                            |
|                                 |      | 61.1        | 57.4        | 55.7        | 52.9        |       |       |                                                   |                                        |                               |                                            |
|                                 |      | 60.1        | 57.5        | 55.2        | 53.4        |       |       |                                                   |                                        |                               |                                            |
|                                 |      | 61.7        | 58.0        | 55.0        | 52.8        |       |       |                                                   |                                        |                               |                                            |
|                                 |      | 61.4        | 57.4        | 55.6        | 53.2        |       |       |                                                   |                                        |                               |                                            |
|                                 |      | 60.2        | 57.2        | 55.3        | 52.0        |       |       |                                                   |                                        |                               |                                            |
|                                 |      | 61.1        | 57.6        | 55.1        | 52.5        |       |       |                                                   |                                        |                               |                                            |
|                                 |      | 60.9        | 58.3        | 55.1        | 52.3        |       |       |                                                   |                                        |                               |                                            |

|                           |  |             |             |             |             |  |  |  |  |  |  |
|---------------------------|--|-------------|-------------|-------------|-------------|--|--|--|--|--|--|
|                           |  | 60.4        | 57.6        | 56.2        |             |  |  |  |  |  |  |
|                           |  | 61.0        | 57.9        | 56.2        |             |  |  |  |  |  |  |
|                           |  | 60.9        | 58.0        | 55.6        |             |  |  |  |  |  |  |
|                           |  | 60.3        | 58.2        | 56.2        |             |  |  |  |  |  |  |
|                           |  | 60.1        |             | 55.8        |             |  |  |  |  |  |  |
|                           |  | 60.7        |             | 55.8        |             |  |  |  |  |  |  |
|                           |  | 60.2        |             | 56.0        |             |  |  |  |  |  |  |
|                           |  | 59.9        |             | 56.3        |             |  |  |  |  |  |  |
|                           |  |             |             | 55.7        |             |  |  |  |  |  |  |
| <b>Average</b>            |  | <b>60.7</b> | <b>57.7</b> | <b>55.7</b> | <b>52.7</b> |  |  |  |  |  |  |
| <b>Standard Deviation</b> |  | <b>0.5</b>  | <b>0.4</b>  | <b>0.4</b>  | <b>0.5</b>  |  |  |  |  |  |  |

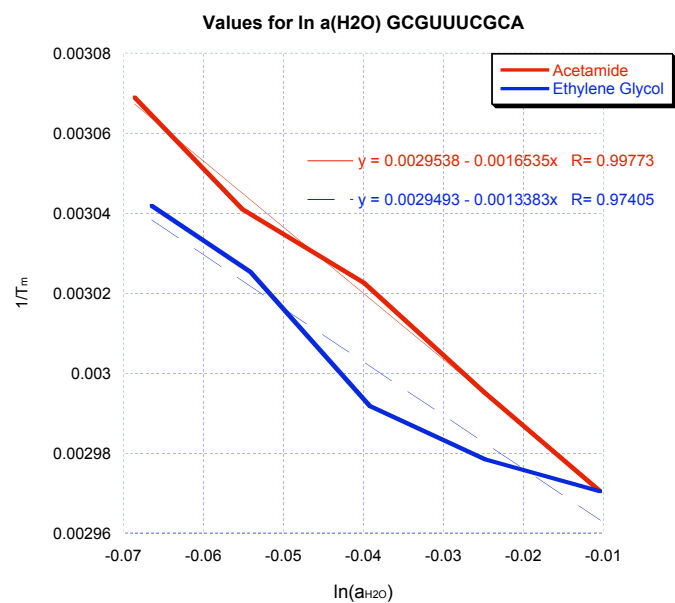

**Figure S6.** Plot of the inverse of the melting temperature versus the natural log of the water activity for both acetamide and ethylene glycol.

**Table S4.** Experimental  $t_m$  and thermodynamic data for melting of r(GCGUUUCGCAA)

| Trial #                         | 0%   | 5%          | 10%         | 15%         | 20%         | T1   | T2    | $\Delta H$ (cal/mol)<br>$\delta\alpha/\delta T_m$ | Van't Hoff<br>$\Delta H$<br>(kcal/mol) | Van't Hoff<br>$\Delta S$ (eu) | $\Delta G(37^\circ\text{C})$<br>(kcal/mol) |
|---------------------------------|------|-------------|-------------|-------------|-------------|------|-------|---------------------------------------------------|----------------------------------------|-------------------------------|--------------------------------------------|
| <b>Ethylene Glycol at 280nm</b> |      |             |             |             |             |      |       |                                                   |                                        |                               |                                            |
|                                 | 67.7 | 65.9        | 63.9        | 62          | 60.8        | 57.7 | 80.6  | 35770                                             | 38.56                                  | 0.1127                        | -3.623                                     |
|                                 | 67.4 | 65.2        | 64          | 62.4        | 60.8        | 56.7 | 79.8  | 35270                                             | 39.8                                   | 0.1                           | -3.633                                     |
|                                 | 68.1 | 66.4        | 64          | 62.7        | 60.8        | 55.4 | 78.34 | 35208                                             | 34.43                                  | 0.1014                        | -2.996                                     |
|                                 | 67.6 | 65.7        | 63.8        | 62.4        | 60.5        | 55.4 | 79.08 | 34179                                             | 34.44                                  | 0.1013                        | -3.037                                     |
|                                 | 68.4 | 65          | 63.8        |             | 60.9        | 56.6 | 81.31 | 33082                                             | 35.7                                   | 0.1043                        | -3.367                                     |
|                                 | 67.9 | 65.2        | 63.8        |             | 60.6        | 56.4 | 80.09 | 34367                                             | 37.27                                  | 0.1092                        | -3.418                                     |
|                                 |      | 65          | 63.8        |             | 60.4        | 57.6 | 79.41 | 37393                                             | 39.62                                  | 0.116                         | -3.66                                      |
|                                 |      | 66.4        | 63.6        |             | 60.7        | 56.5 | 79    | 36084                                             | 40.03                                  | 0.1174                        | -3.636                                     |
|                                 |      | 65.8        | 64          |             | 60.7        | 57.6 | 78.68 | 38608                                             | 42.24                                  | 0.1238                        | -3.862                                     |
|                                 |      | 65.7        | 63.2        |             | 60.5        | 56.9 | 78.66 | 37320                                             | 40.1                                   | 0.1177                        | -3.613                                     |
| Average                         | 67.9 | <b>65.6</b> | <b>63.8</b> | <b>62.4</b> | <b>60.7</b> | 56.7 | 79.5  | 35728.1                                           | 38.2                                   | 0.11205                       | -3.4845                                    |
| Standard Deviation              | 0.4  | <b>0.5</b>  | <b>0.2</b>  | <b>0.3</b>  | <b>0.2</b>  | 0.8  | 0.9   | 1682.0                                            | 2.7                                    | 0.007699                      | 0.281094                                   |
| <b>Acetamide at 280nm</b>       |      |             |             |             |             |      |       |                                                   |                                        |                               |                                            |
|                                 |      | 65.7        | 61.4        | 58.8        | 55.8        |      |       |                                                   |                                        |                               |                                            |
|                                 |      | 65.2        | 61.7        | 59.1        | 55.5        |      |       |                                                   |                                        |                               |                                            |
|                                 |      | 64.5        | 61.9        | 59          | 54.7        |      |       |                                                   |                                        |                               |                                            |
|                                 |      | 65.6        | 61.8        | 59          | 55.1        |      |       |                                                   |                                        |                               |                                            |
|                                 |      | 64.6        |             | 59.4        | 55.6        |      |       |                                                   |                                        |                               |                                            |
|                                 |      | 64.3        |             | 59.3        | 55.7        |      |       |                                                   |                                        |                               |                                            |
|                                 |      |             |             |             | 55.2        |      |       |                                                   |                                        |                               |                                            |
|                                 |      |             |             |             | 55.0        |      |       |                                                   |                                        |                               |                                            |
|                                 |      |             |             |             | 54.7        |      |       |                                                   |                                        |                               |                                            |
|                                 |      |             |             |             |             |      |       |                                                   |                                        |                               |                                            |

|                    |  |      |      |      |      |  |  |  |  |  |
|--------------------|--|------|------|------|------|--|--|--|--|--|
| Average            |  | 65.0 | 61.7 | 59.1 | 55.3 |  |  |  |  |  |
| Standard Deviation |  | 0.6  | 0.2  | 0.2  | 0.4  |  |  |  |  |  |

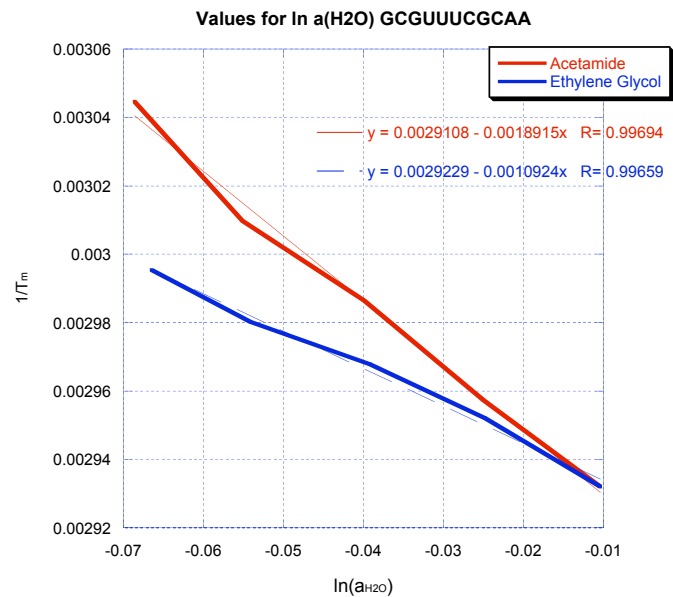

**Figure S7.** Plot of the inverse of the melting temperature versus the natural log of the water activity for both acetamide and ethylene glycol.

**Table S5.** Experimental  $t_m$  and thermodynamic data for melting of G<sub>r</sub>CGUUUCG<sub>r</sub>

| Trial #                         | 0%   | 5%          | 10%         | 15%         | 20%         | T1    | T2    | $\Delta H$ (cal/mol)<br>$\delta\alpha/\delta T_m$ | Van't Hoff<br>$\Delta H$<br>(kcal/mol) | Van't Hoff<br>$\Delta S$ (eu) | $\Delta G(37^\circ\text{C})$<br>(kcal/mol) |
|---------------------------------|------|-------------|-------------|-------------|-------------|-------|-------|---------------------------------------------------|----------------------------------------|-------------------------------|--------------------------------------------|
| <b>Ethylene Glycol at 280nm</b> |      |             |             |             |             |       |       |                                                   |                                        |                               |                                            |
|                                 | 57.3 | 56.4        | 55.6        | 54          | 53.9        | 42.94 | 72.22 | 26075.19                                          | 29.59                                  | 0.08929                       | -1.9101                                    |
|                                 | 57.1 | 56.2        | 56.1        | 54.7        | 53.4        | 43.12 | 71.36 | 26983.48                                          | 30.46                                  | 0.09215                       | -1.8935                                    |
|                                 | 57.6 | 56.6        | 55.9        | 54.8        | 53.6        | 43.25 | 69.7  | 28682.5                                           | 31.17                                  | 0.09444                       | -1.8936                                    |
|                                 | 57.6 | 56          | 55.4        | 55.1        | 52.9        | 43.55 | 72.14 | 26749.86                                          | 28.84                                  | 0.08711                       | -1.8359                                    |
|                                 | 57.5 | 56.7        | 55.4        | 54.9        | 52.9        | 43.23 | 72.97 | 25751.27                                          | 29.65                                  | 0.08937                       | -1.9453                                    |
|                                 | 57   | 55.8        |             | 54.3        | 53.8        | 42.32 | 73.31 | 24665.68                                          | 27.09                                  | 0.08153                       | -1.8157                                    |
|                                 |      | 56.7        |             | 54.1        | 53.1        |       |       |                                                   |                                        |                               |                                            |
|                                 |      | 56          |             | 54.9        | 53.4        |       |       |                                                   |                                        |                               |                                            |
|                                 |      |             |             | 54.6        |             |       |       |                                                   |                                        |                               |                                            |
| Average                         | 57.4 | <b>56.3</b> | <b>55.7</b> | <b>54.6</b> | <b>53.4</b> | 43.1  | 72.0  | 26484.7                                           | 29.5                                   | 0.088982                      | -1.88235                                   |
| Standard Deviation              | 0.3  | <b>0.4</b>  | <b>0.3</b>  | <b>0.4</b>  | <b>0.4</b>  | 0.4   | 1.3   | 1353.8                                            | 1.4                                    | 0.004452                      | 0.048132                                   |
| <b>Acetamide at 280nm</b>       |      |             |             |             |             |       |       |                                                   |                                        |                               |                                            |
|                                 |      | 55.7        | 53.8        | 51.9        | 50.7        |       |       |                                                   |                                        |                               |                                            |
|                                 |      | 56.0        | 53.6        | 52.2        | 50.3        |       |       |                                                   |                                        |                               |                                            |
|                                 |      | 55.8        | 52.9        | 52.0        | 51.1        |       |       |                                                   |                                        |                               |                                            |
|                                 |      | 56.1        | 53.7        |             | 49.8        |       |       |                                                   |                                        |                               |                                            |
|                                 |      | 56.7        |             |             |             |       |       |                                                   |                                        |                               |                                            |
| Average                         |      | <b>56.1</b> | <b>53.5</b> | <b>52.0</b> | <b>50.5</b> |       |       |                                                   |                                        |                               |                                            |
| Standard Deviation              |      | <b>0.4</b>  | <b>0.4</b>  | <b>0.2</b>  | <b>0.6</b>  |       |       |                                                   |                                        |                               |                                            |



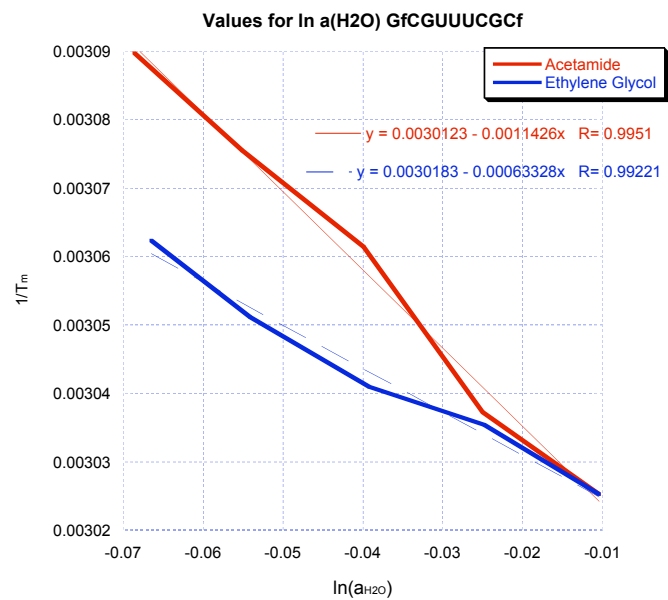

**Figure S8.** Plot of the inverse of the melting temperature versus the natural log of the water activity for both acetamide and ethylene glycol.

**Table S6.** Experimental  $t_m$  and thermodynamic data for melting of  $G_rCGUUUCGC_rA_f$

| Trial #                         | 0%   | 5%          | 10%         | 15%         | 20%         | T1    | T2    | $\Delta H$ (cal/mol)<br>$\delta\alpha/\delta T_m$ | Van't Hoff<br>$\Delta H$<br>(kcal/mol) | Van't Hoff<br>$\Delta S$ (eu) | $\Delta G(37^\circ C)$<br>(kcal/mol) |
|---------------------------------|------|-------------|-------------|-------------|-------------|-------|-------|---------------------------------------------------|----------------------------------------|-------------------------------|--------------------------------------|
| <b>Ethylene Glycol at 280nm</b> |      |             |             |             |             |       |       |                                                   |                                        |                               |                                      |
|                                 | 75   | 72.6        | 69.2        | 69.3        | 68.4        | 62.53 | 87.06 | 34475.19                                          | 37.64                                  | 0.1082                        | -4.098                               |
|                                 | 74.6 | 72.7        | 70.2        | 69.9        | 68.7        | 60.79 | 84.11 | 35780.37                                          | 39.75                                  | 0.1151                        | -4.069                               |
|                                 | 74.5 | 72.4        | 69.8        | 68.7        | 67.9        | 62.03 | 87.1  | 33686.08                                          | 37.16                                  | 0.1069                        | -4.021                               |
|                                 | 73.3 | 72.5        | 69.4        | 69.2        | 67.6        | 61.92 | 86.34 | 34498.41                                          | 37.38                                  | 0.1076                        | -4.024                               |
|                                 | 74   | 72.1        | 69.7        | 69.5        | 67.5        | 61.81 | 85.24 | 35834.24                                          | 37.64                                  | 0.1086                        | -3.974                               |
|                                 | 74.5 | 71.1        | 69.6        | 69          | 68          | 63.92 | 84.02 | 41891.06                                          | 39.74                                  | 0.1144                        | -4.276                               |
|                                 | 74.5 | 71.7        | 70.8        | 68.7        | 67.1        |       |       |                                                   |                                        |                               |                                      |
|                                 |      | 71.6        | 70.6        | 68.6        | 67.2        |       |       |                                                   |                                        |                               |                                      |
|                                 |      | 72.3        | 70.1        | 68.7        | 67          |       |       |                                                   |                                        |                               |                                      |
|                                 |      | 71.3        | 69.9        | 68.1        | 67.1        |       |       |                                                   |                                        |                               |                                      |
|                                 |      | 72          |             | 68.8        | 67.3        |       |       |                                                   |                                        |                               |                                      |
|                                 |      | 72.5        |             | 68.6        | 67.3        |       |       |                                                   |                                        |                               |                                      |
|                                 |      | 71.5        |             | 69          | 67.4        |       |       |                                                   |                                        |                               |                                      |
|                                 |      |             |             | 69.2        | 67.7        |       |       |                                                   |                                        |                               |                                      |
|                                 |      |             |             |             |             |       |       |                                                   |                                        |                               |                                      |
| Average                         | 74.3 | <b>72.0</b> | <b>69.9</b> | <b>69.0</b> | <b>67.6</b> | 62.2  | 85.6  | 36027.6                                           | 38.2                                   | 0.110133                      | -4.077                               |
| Standard Deviation              | 0.5  | <b>0.5</b>  | <b>0.5</b>  | <b>0.5</b>  | <b>0.5</b>  | 1.0   | 1.4   | 2990.3                                            | 1.2                                    | 0.003629                      | 0.106452                             |
|                                 |      |             |             |             |             |       |       |                                                   |                                        |                               |                                      |
| <b>Acetamide at 280nm</b>       |      |             |             |             |             |       |       |                                                   |                                        |                               |                                      |
|                                 |      | 72.0        | 67.9        | 66.0        | 64.6        |       |       |                                                   |                                        |                               |                                      |
|                                 |      | 70.9        | 67.7        | 65.5        | 63.7        |       |       |                                                   |                                        |                               |                                      |
|                                 |      | 71.8        | 67.5        | 65.2        | 63.9        |       |       |                                                   |                                        |                               |                                      |
|                                 |      | 70.0        | 67.8        | 66.3        | 63.7        |       |       |                                                   |                                        |                               |                                      |

|                    |  |             |             |             |             |  |  |  |  |  |  |
|--------------------|--|-------------|-------------|-------------|-------------|--|--|--|--|--|--|
|                    |  | 69.9        | 68.2        | 66.0        | 64.2        |  |  |  |  |  |  |
|                    |  | 70.0        | 67.4        | 65.3        | 64.0        |  |  |  |  |  |  |
|                    |  | 71.7        | 68.5        | 65.8        | 63.9        |  |  |  |  |  |  |
|                    |  | 70.6        | 67.9        | 65.8        | 63.8        |  |  |  |  |  |  |
|                    |  | 70.3        | 67.4        | 66.1        | 64.1        |  |  |  |  |  |  |
|                    |  | 70.0        |             | 66.8        | 63.4        |  |  |  |  |  |  |
|                    |  | 71.5        |             | 65.0        | 63.7        |  |  |  |  |  |  |
|                    |  | 69.9        |             | 65.4        | 63.5        |  |  |  |  |  |  |
| Average            |  | <b>70.7</b> | <b>67.8</b> | <b>65.8</b> | <b>63.9</b> |  |  |  |  |  |  |
| Standard Deviation |  | <b>0.8</b>  | <b>0.4</b>  | <b>0.5</b>  | <b>0.3</b>  |  |  |  |  |  |  |

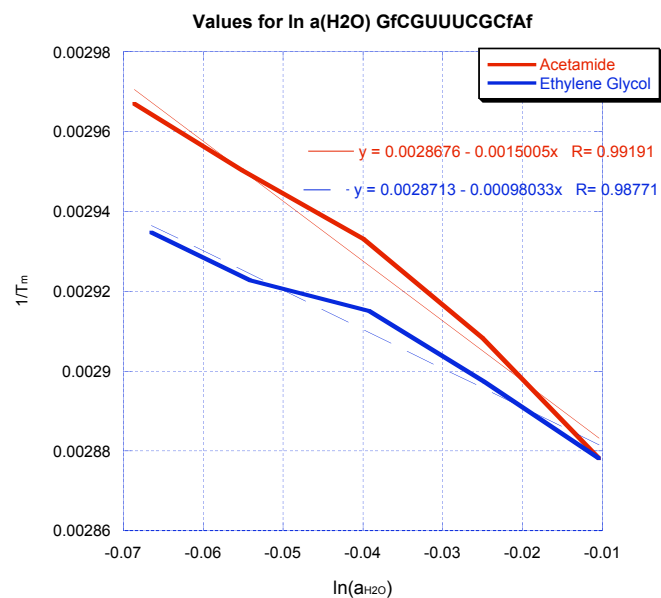

**Figure S9.** Plot of the inverse of the melting temperature versus the natural log of the water activity for both acetamide and ethylene glycol.

**Table S7.** Experimental  $t_m$  and thermodynamic data for melting of G<sub>r</sub>CGUUUCGC<sub>r</sub>A<sub>r</sub>A<sub>r</sub>

| Trial #                         | 0%   | 5%          | 10%         | 15%         | 20%         | T1    | T2    | $\Delta H$ (cal/mol)<br>$\delta\alpha/\delta T_m$ | Van't Hoff<br>$\Delta H$<br>(kcal/mol) | Van't Hoff<br>$\Delta S$ (eu) | $\Delta G(37^\circ\text{C})$<br>(kcal/mol) |
|---------------------------------|------|-------------|-------------|-------------|-------------|-------|-------|---------------------------------------------------|----------------------------------------|-------------------------------|--------------------------------------------|
| <b>Ethylene Glycol at 280nm</b> |      |             |             |             |             |       |       |                                                   |                                        |                               |                                            |
|                                 | 77.2 | 74.9        | 72.7        | 71.3        | 69.3        | 65.69 | 88.91 | 36952.07                                          | 38.59                                  | 0.1102                        | -4.428                                     |
|                                 | 77   | 73.9        | 72.1        | 71.6        | 69.3        | 64.89 | 89.02 | 35485.31                                          | 39.05                                  | 0.1117                        | -4.423                                     |
|                                 | 76.8 | 74.7        | 72.5        | 71          | 69.3        | 64.5  | 88.16 | 36062.57                                          | 39.83                                  | 0.1139                        | -4.521                                     |
|                                 | 76.5 | 74.5        | 71.9        | 71.1        | 69.8        | 67.02 | 89.94 | 37689.7                                           | 40.85                                  | 0.1161                        | -4.859                                     |
|                                 | 77.4 | 74          | 72.6        | 71.2        | 68.8        | 64.33 | 87.69 | 36459.8                                           | 39.69                                  | 0.1138                        | -4.412                                     |
|                                 | 77.2 | 74.9        | 72.4        | 71          | 68.8        | 65.73 | 90.34 | 35006.87                                          | 36.95                                  | 0.1053                        | -4.307                                     |
|                                 | 77.3 | 73.8        | 72.2        | 71.6        | 68.9        |       |       |                                                   |                                        |                               |                                            |
|                                 |      | 74.7        | 73          | 71.1        |             |       |       |                                                   |                                        |                               |                                            |
|                                 |      | 75          | 73          | 71.4        |             |       |       |                                                   |                                        |                               |                                            |
|                                 |      | 74.0        | 73.2        | 71.3        |             |       |       |                                                   |                                        |                               |                                            |
|                                 |      | 74.9        | 72.7        | 70.6        |             |       |       |                                                   |                                        |                               |                                            |
|                                 |      |             |             | 70.0        |             |       |       |                                                   |                                        |                               |                                            |
|                                 |      |             |             |             |             |       |       |                                                   |                                        |                               |                                            |
| Average                         | 77.1 | <b>74.5</b> | <b>72.6</b> | <b>71.1</b> | <b>69.2</b> | 65.4  | 89.0  | 36276.1                                           | 39.2                                   | 0.111833                      | -4.49167                                   |
| Standard Deviation              | 0.3  | <b>0.5</b>  | <b>0.4</b>  | <b>0.4</b>  | <b>0.4</b>  | 1.0   | 1.0   | 976.8                                             | 1.3                                    | 0.003787                      | 0.19236                                    |
|                                 |      |             |             |             |             |       |       |                                                   |                                        |                               |                                            |
| <b>Acetamide at 280nm</b>       |      |             |             |             |             |       |       |                                                   |                                        |                               |                                            |
|                                 |      | 74.3        | 70.6        | 69.2        | 66.0        |       |       |                                                   |                                        |                               |                                            |
|                                 |      | 73.7        | 71.2        | 68.4        | 66.1        |       |       |                                                   |                                        |                               |                                            |
|                                 |      | 73.5        | 72.0        | 68.1        | 65.4        |       |       |                                                   |                                        |                               |                                            |
|                                 |      | 73.3        | 70.9        | 68.7        | 66.9        |       |       |                                                   |                                        |                               |                                            |
|                                 |      | 73.8        | 71.0        | 69.5        | 65.7        |       |       |                                                   |                                        |                               |                                            |
|                                 |      | 74.4        | 70.5        | 69.4        |             |       |       |                                                   |                                        |                               |                                            |
|                                 |      | 72.7        | 70.8        |             |             |       |       |                                                   |                                        |                               |                                            |

|                    |  |             |             |             |             |  |  |  |  |  |
|--------------------|--|-------------|-------------|-------------|-------------|--|--|--|--|--|
|                    |  | 73.5        |             |             |             |  |  |  |  |  |
| Average            |  | <b>73.7</b> | <b>71.0</b> | <b>68.9</b> | <b>66.0</b> |  |  |  |  |  |
| Standard Deviation |  | <b>0.5</b>  | <b>0.5</b>  | <b>0.6</b>  | <b>0.6</b>  |  |  |  |  |  |

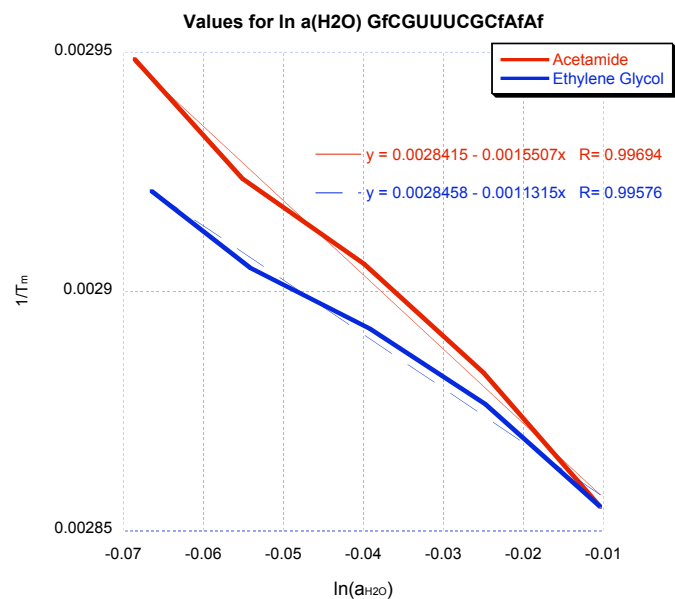

**Figure S10.** Plot of the inverse of the melting temperature versus the natural log of the water activity for both acetamide and ethylene glycol.

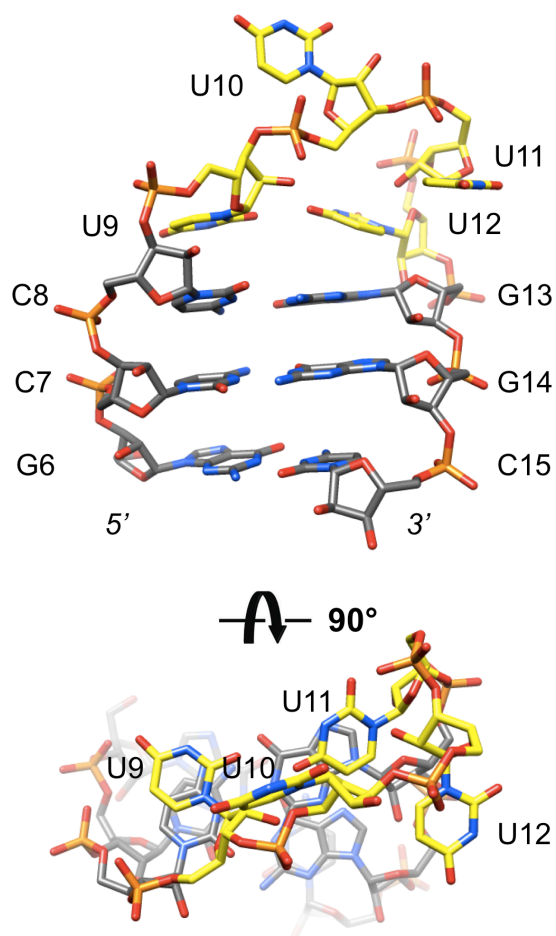

**Figure S11.** NMR solution structure of a portion of the U2 snRNA stem I from *S. cerevisiae* (PDB ID 2o33)<sup>[4]</sup> viewed into the minor groove (top) and rotated around the horizontal by 90 degrees (bottom). Only the (GCC):(GGC) stem and the U4 loop are depicted, with carbon atoms colored in gray and yellow, respectively. The two projections illustrate the absence of stacking among loop uracils and very limited stacking between U9 and C8 and between U12 and G13. Similarly, no hydrogen bonds are established between nucleobase moieties from loop residues.

[4] D. G. Sashital, V. Venditti, C.G. Angers, G. Cornilescu, S. E. Butcher, *RNA* **2007**, *13*, 328–338.
